# Supplementary material for: The pH dependence of the anisotropy factors of essential amino acidsElectronic supplementary information (ESI) available: a table giving the precise pH and concentrations of amino acids, the UV spectra of Gly at various pHs, the UV, CD and g spectra of Pro at pH 13, the UV spectra of propane-1-thiol at various pHs and the CD spectra of L-Leu and L-Phe at various concentrations. See http://www.rsc.org/suppdata/p2/b1/b108575c/
Source: Royal Society of Chemistry journal article supplement (doi:10.1039/b108575c), 2002-01-18
Supplement: b108575c.doc [file b108575c.doc]

**Supplementary data**

**Table S1** Precise pH and concentration of L- and D-amino acids indicated by pH 7

|  | L-Amino acid | | | |  | | D-Amino acid |
| --- | --- | --- | --- | --- | --- | --- | --- |
|  | Concentration / mM | | Precise pH (˚C) | |  | | Concentration / mM |
| Ala | 13.9 | 6.60 (23.6) | |  | | 9.32 | |
| Leu | 8.61 | 6.63 (22.5) | |  | | 7.70 | |
| Val | 8.37 | | 6.95 (23.4) | |  | | 7.60 |
| Ile | 6.94 | | 6.89 (23.2) | |  | | 8.16 |
| Pro | 6.86 | | 6.64 (24.6) | |  | | 10.3 |
| Ser | 8.56 | | 6.67 (24.7) | |  | | 9.52 |
| Thr | 8.90 | | 6.61 (22.7) | |  | | 8.90 |
| Cys | 8.57  0.86 | | 6.62 (25.4)  6.89 (24.3) | |  | | 8.60  0.86 |
| Met | 0.27 | | 7.39 (23.3) | |  | | 0.28 |
| Asp | 8.94 | | 6.34 (23.9) | |  | | 8.83 |
| Glu | 8.94 | | 6.23 (23.6) | |  | | 9.04 |
| Asn | 0.30 | | 6.78 (24.0) | |  | | 0.31 |
| Gln | 0.28 | | 7.10 (24.4) | |  | | 0.29 |
| Lys | 2.35 | | 6.25 (23.3) | |  | | 2.30 |
| Arg | 0.28 | | 7.47 (22.9) | |  | | 0.28 |
| Phe | 0.30 | | 6.74 (24.5) | |  | | 0.32 |
| Tyr | 0.033 | | 7.49 (24.4) | |  | | 0.032 |
| His | 0.34 | | 7.06 (24.2) | |  | | 0.36 |
| Trp | 0.026 | | 7.12 (24.6) | |  | | 0.025 |
